# Supplementary material for: The Multi-Step Chain Extension for Waterborne Polyurethane Binder of Para-Aramid Fabrics
Source: MDPI journal article supplement (doi:10.3390/molecules27217588), 2022-11-05
Supplement: s1 [file s1]

# Supporting information

## The multi-step chain extension for waterborne polyurethane binder of *para*-aramid fabrics

**Table S1** Relative contributions of free, ordered and disordered H-bonded C=O in WPU.

| Sample                                         | Peak 1  | Peak 2     | Peak 3 |
|------------------------------------------------|---------|------------|--------|
|                                                | ordered | disordered | free   |
| WPU-G                                          | 27      | 28         | 45     |
| 3D <sub>1</sub> -G                             | 31      | 44         | 25     |
| 3D <sub>2</sub> -G                             | 29      | 46         | 25     |
| 3D <sub>3</sub> -G                             | 39      | 26         | 35     |
| 3D <sub>4</sub> -G                             | 32      | 41         | 27     |
| 3D <sub>5</sub> -G                             | 31      | 46         | 23     |
| 3T <sub>2</sub> -G                             | 70      | 25         | 5      |
| 3P <sub>2</sub> -G                             | 65      | 20         | 15     |
| 1D <sub>2</sub> -G                             | 60      | 20         | 20     |
| 2D <sub>2</sub> -G                             | 63      | 21         | 16     |
| 3D <sub>2</sub> -G <sub>8</sub> L <sub>2</sub> | 62      | 22         | 16     |
| 3D <sub>2</sub> -G <sub>6</sub> L <sub>4</sub> | 48      | 32         | 20     |
| 3D <sub>2</sub> -G <sub>4</sub> L <sub>6</sub> | 57      | 20         | 23     |
| 3D <sub>2</sub> -G <sub>2</sub> L <sub>8</sub> | 58      | 27         | 15     |
| 3D <sub>2</sub> -L                             | 28      | 32         | 40     |

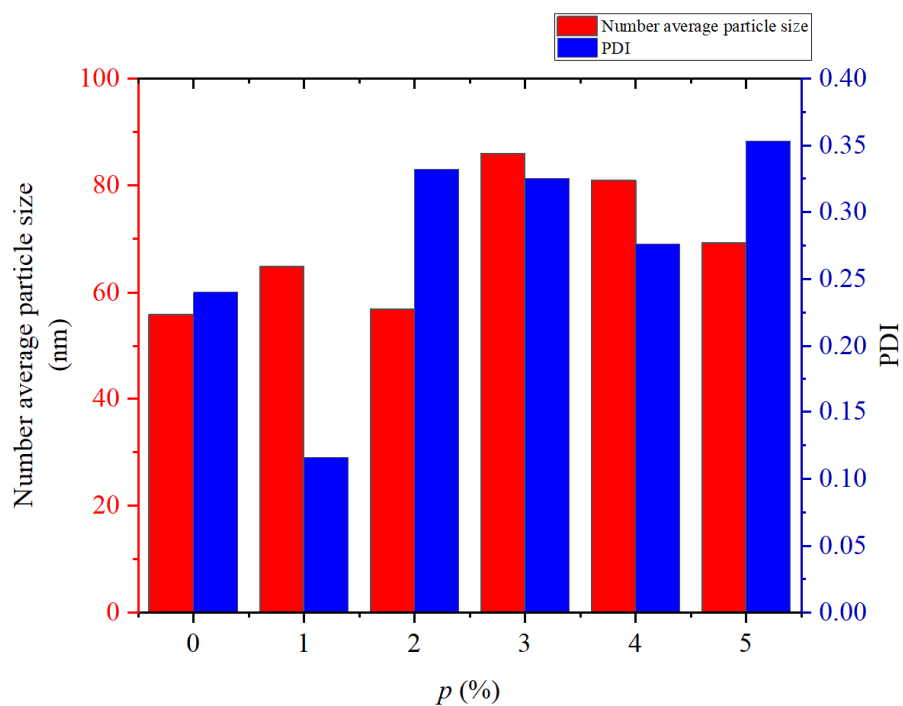

**Figure S1.** Effect of DMU content on the number-average particle size and PDI of WPU-G and 3D<sub>p</sub>-G.

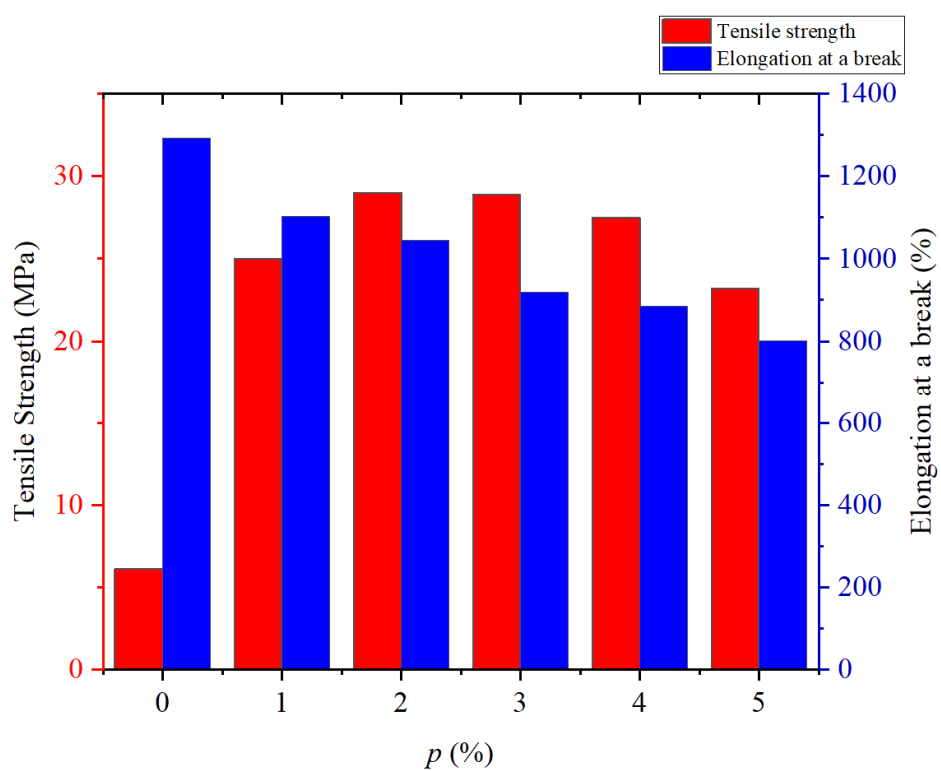

**Figure S2.** Effect of DMU content on tensile strength and elongation at break of WPU-G and 3D<sub>p</sub>-G.

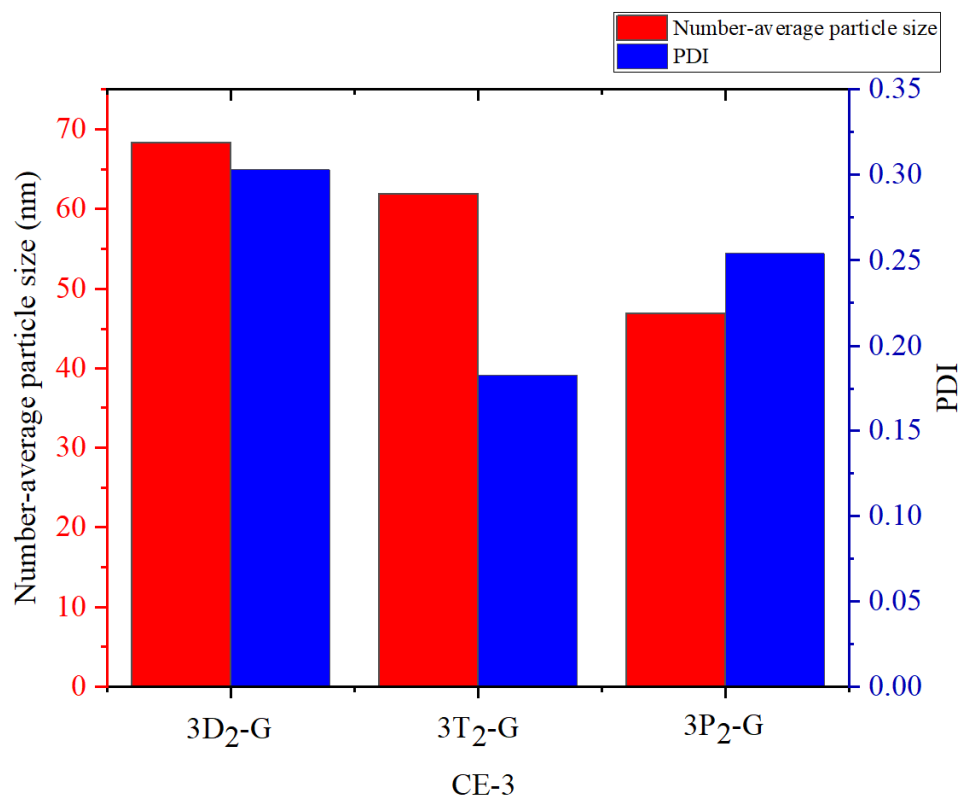

**Figure S3.** Number average particle size and PDI of 3D<sub>2</sub>-G, 3T<sub>2</sub>-G and 3P<sub>2</sub>-G.

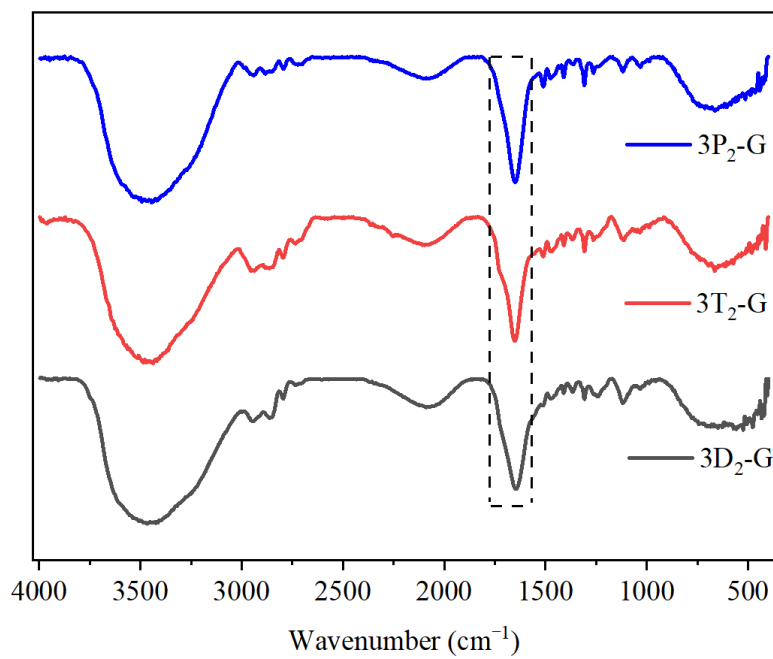

**Figure S4.** The FTIR spectra of 3D<sub>2</sub>-G, 3T<sub>2</sub>-G and 3P<sub>2</sub>-G.

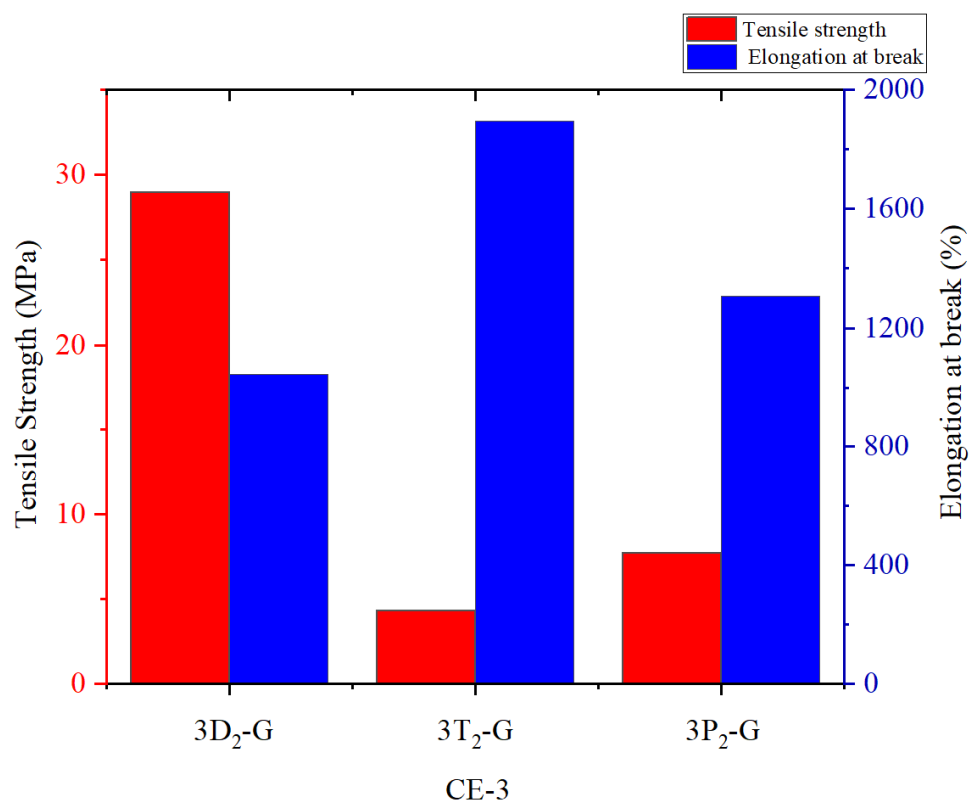

**Figure S5.** Tensile strength and the elongation at break of 3D<sub>2</sub>-G, 3T<sub>2</sub>-G and 3P<sub>2</sub>-G.

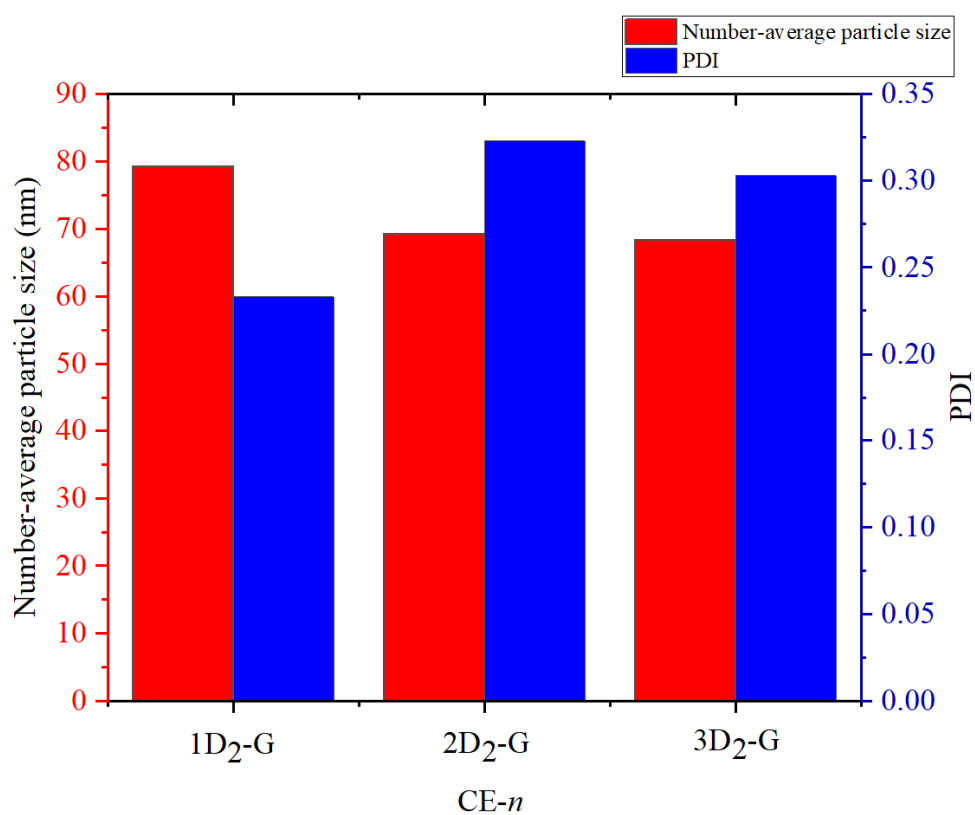

**Figure S6.** Number average particle size and PDI of 1D<sub>2</sub>-G, 2D<sub>2</sub>-G and 3D<sub>2</sub>-G.

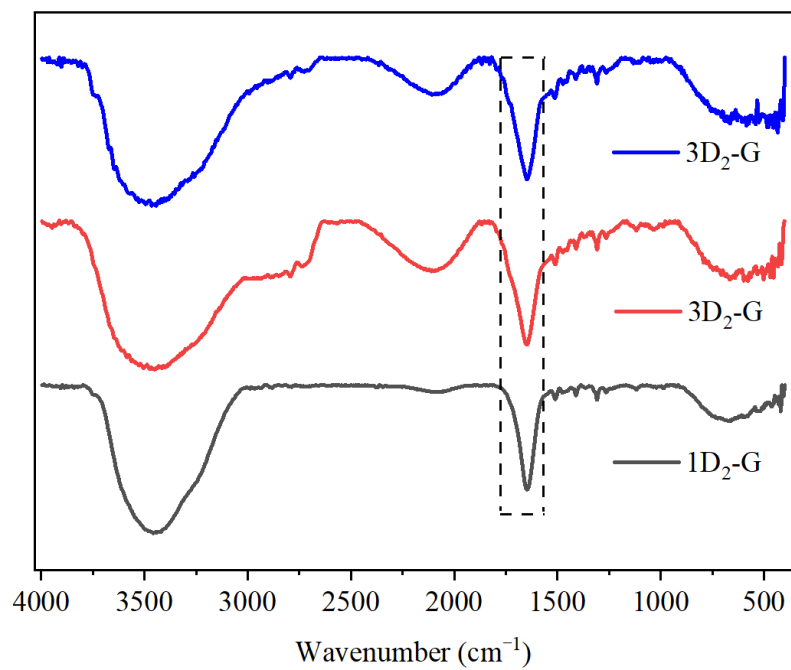

**Figure S7.** The FTIR spectra of 1D<sub>2</sub>-G, 2D<sub>2</sub>-G and 3D<sub>2</sub>-G.

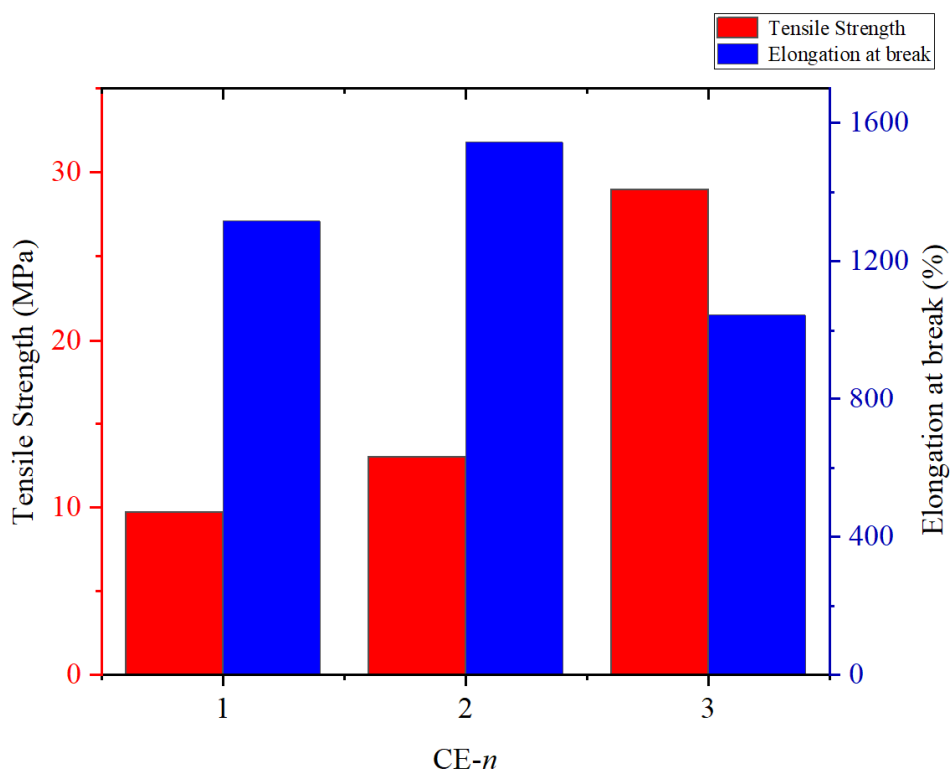

**Figure S8.** Tensile strength and the elongation at break of 1D<sub>2</sub>-G, 2D<sub>2</sub>-G and 3D<sub>2</sub>-G.

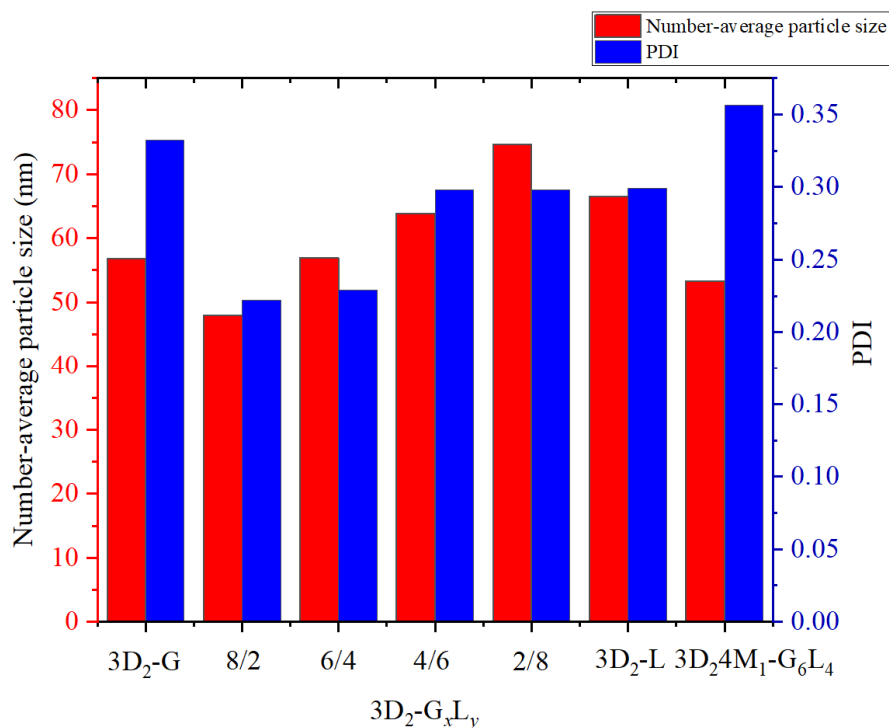

**Figure S9.** Effect of PTMG/PCL molar ratio ( $x/y$ ) on number-average particle size and PDI of 3D<sub>2</sub>-G <sub>$x$</sub> L <sub>$y$</sub>  samples.(where  $x/y$  were 8/2, 6/4, 4/6, and 2/8, respectively. For comparison purposes , also summarizes the results for 3D<sub>2</sub>-G and 3D<sub>2</sub>-L.)

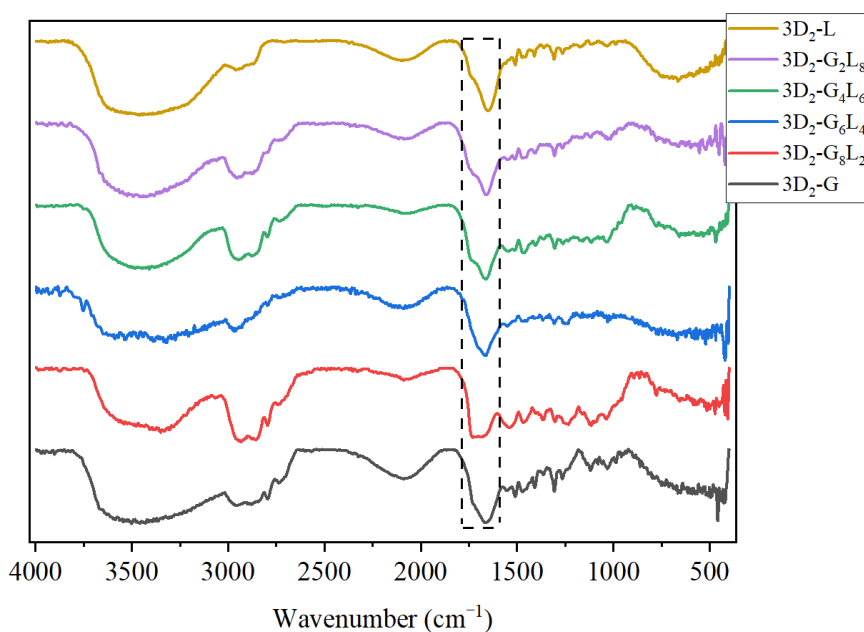

**Figure S10.** The FTIR spectra of 3D<sub>2</sub>-G <sub>$x$</sub> L <sub>$y$</sub>  samples.(where  $x/y$  were 8/2, 6/4, 4/6, and 2/8, respectively. For comparison purposes , also summarizes the results for 3D<sub>2</sub>-G and 3D<sub>2</sub>-L.)

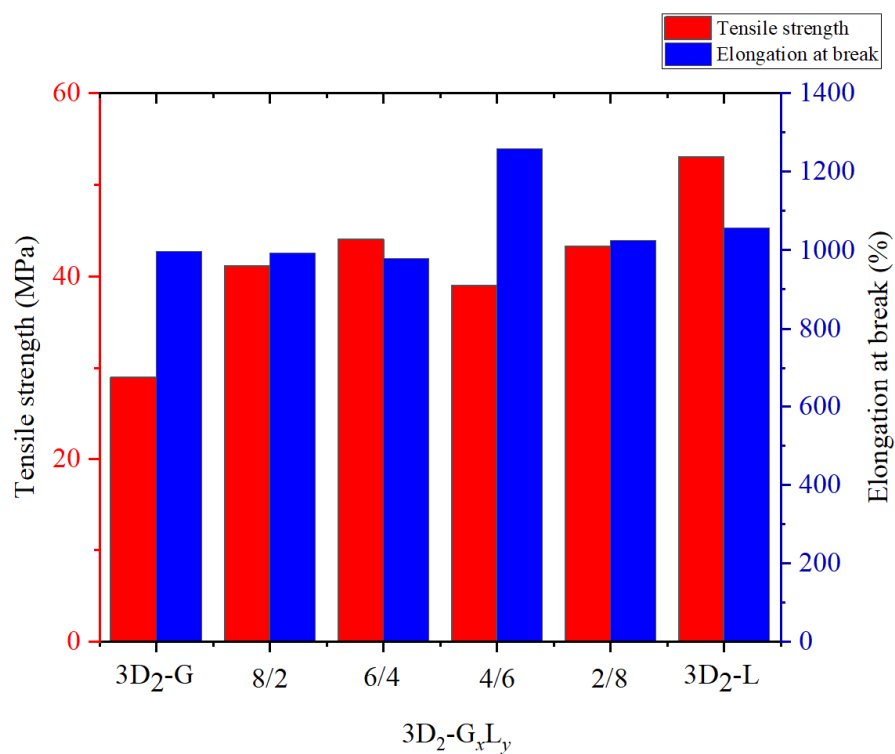

**Figure S11.** Tensile strength and the elongation at break of 3D<sub>2</sub>-G<sub>x</sub>L<sub>y</sub> samples.(where  $x/y$  were 8/2, 6/4, 4/6, and 2/8, respectively. For comparison purposes , also summarizes the results for 3D<sub>2</sub>-G and 3D<sub>2</sub>-L.)
